# Supplementary material for: Proteomic characterization of adrenal gland embryonic development reveals early initiation of steroid metabolism and reduction of the retinoic acid pathway
Source: PubMed Central journal article supplement (PMC4331441; doi:10.1186/s12953-015-0063-8), 2015-02-07
Supplement: 12953_2015_63_MOESM1_ESM.pdf [file 12953_2015_63_MOESM1_ESM.pdf]

Figure S1C

Master Gel Image: E16Nebenniere  
Sample Gel Image: E19Nebenniere

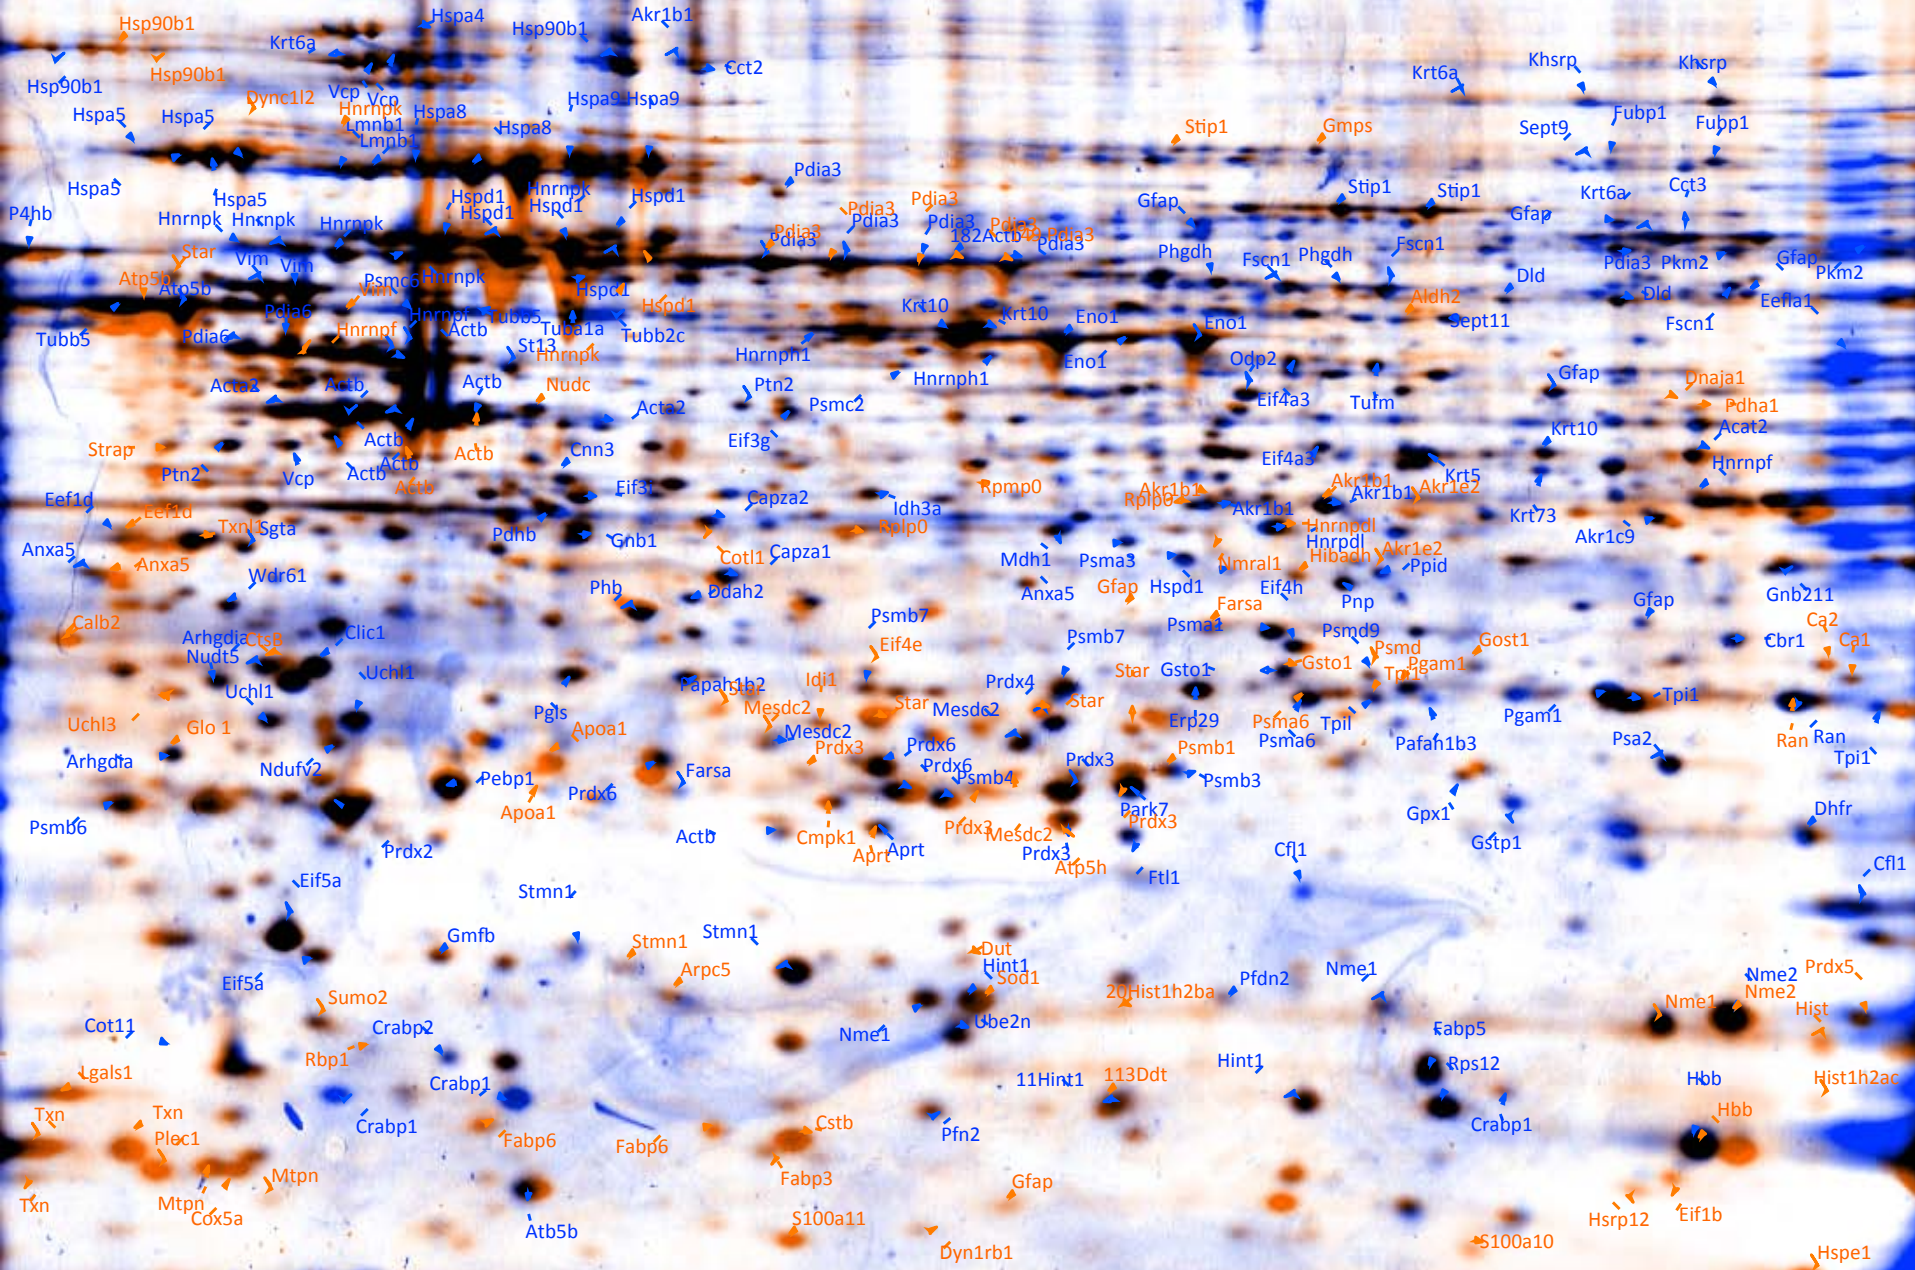







Figure S1E

kidney

adrenal gland

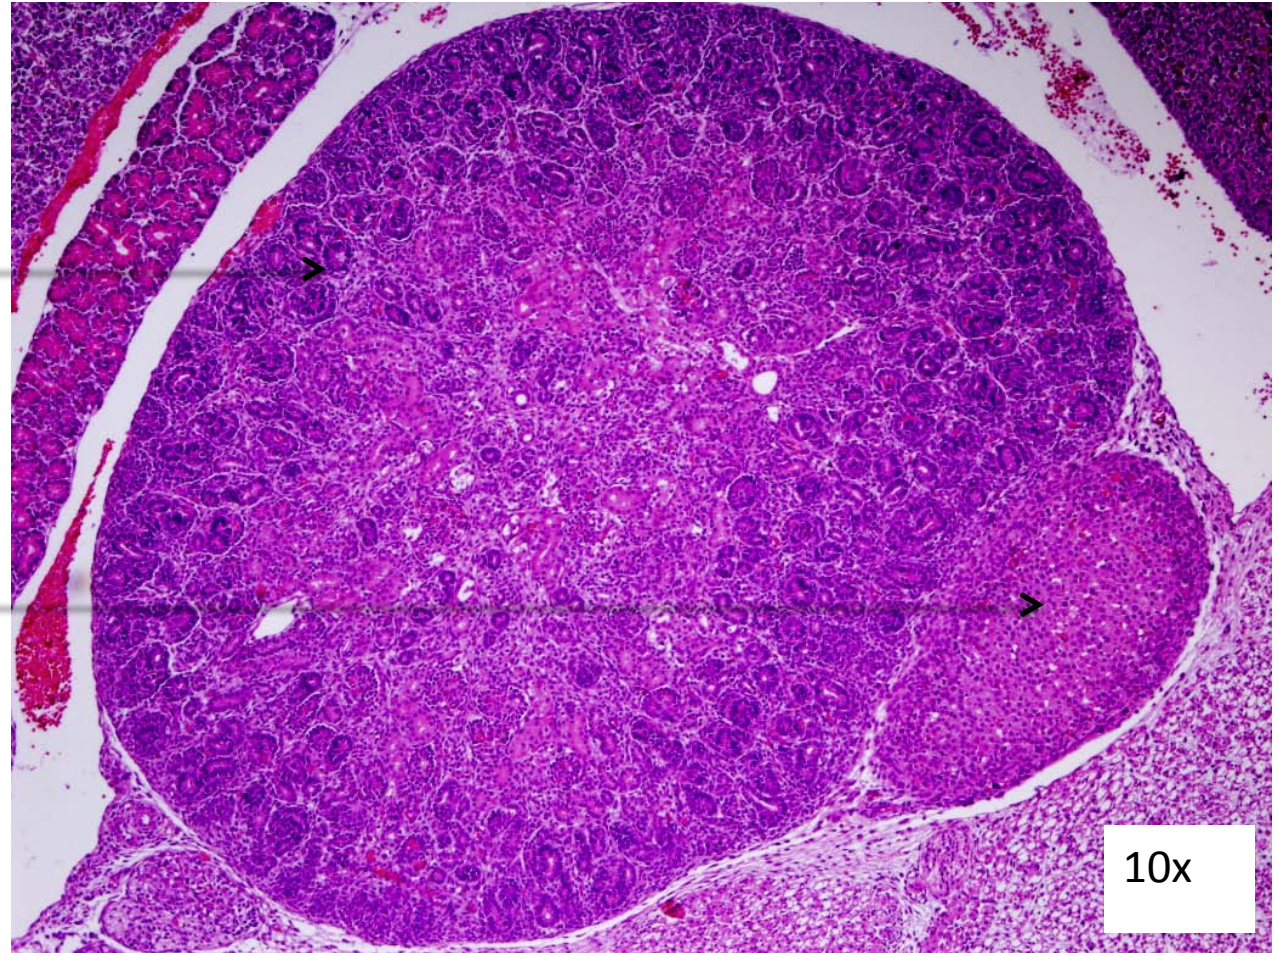

10x
